# Supplementary material
Source: HighWire-hosted journal article supplement (https://bmjopenquality.bmj.com/content/10/2/e001123)
Supplement: inline-supplementary-material-2 [file inline-supplementary-material-2.pdf]

## DVT patient pathway from Radiology *Monday to Friday 8am to 5pm*

All discharged ED patients getting US for query DVT  
regardless of positive or negative results

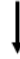

US front desk pages Thrombosis Physician

**Pager number 33322**

Same day Thrombosis Clinic appointment is  
**available**

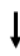

Patient goes upstairs to the Thrombosis Clinic

\*give patient Thrombosis Clinic info sheet

same day Thrombosis Clinic appointment is  
**not available (rare)**

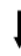

Patient goes to ED for assessment and treatment
